# Supplementary material for: Phylogeography of Rift Valley Fever Virus in Africa and the Arabian Peninsula
Source: PLoS Negl Trop Dis. 2017 Jan 9;11(1):e0005226. doi: 10.1371/journal.pntd.0005226 (PMC5221768; doi:10.1371/journal.pntd.0005226)
Supplement: S12 File — (CSV) [file pntd.0005226.s012.csv]

	origins	destinations	means	medians	modes	lowers	uppers	posterior.probs
Angola.to.Burkina_Faso.count	Angola	Burkina_Faso	0.0144412352810487	0	0	0	0	0.0141079760053321
Angola.to.Central_African_Republic.count	Angola	Central_African_Republic	0.0302155076649633	0	0	0	0	0.0269940013330371
Angola.to.Egypt.count	Angola	Egypt	0.015552099533437	0	0	0	0	0.0149966674072428
Angola.to.Guinea.count	Angola	Guinea	0.0127749389024661	0	0	0	0	0.0125527660519884
Angola.to.Kenya.count	Angola	Kenya	0.256942901577427	0	0	0	1	0.22428349255721
Angola.to.Madagascar.count	Angola	Madagascar	0.104643412574983	0	0	0	1	0.099422350588758
Angola.to.Mauritania.count	Angola	Mauritania	0.0212175072206176	0	0	0	0	0.02099533437014
Angola.to.Mayotte.count	Angola	Mayotte	0.00866474116862919	0	0	0	0	0.00866474116862919
Angola.to.Namibia.count	Angola	Namibia	0.0253277049544546	0	0	0	0	0.0248833592534992
Angola.to.Saudi_Arabia.count	Angola	Saudi_Arabia	0.0239946678515885	0	0	0	0	0.023661408575872
Angola.to.Senegal.count	Angola	Senegal	0.0174405687624972	0	0	0	0	0.0171073094867807
Angola.to.Somalia.count	Angola	Somalia	0.014885580982004	0	0	0	0	0.0146634081315263
Angola.to.South_Africa.count	Angola	South_Africa	0.0657631637413908	0	0	0	1	0.0593201510775383
Angola.to.Sudan.count	Angola	Sudan	0.0125527660519884	0	0	0	0	0.0122195067762719
Angola.to.Tanzania.count	Angola	Tanzania	0.00833148189291269	0	0	0	0	0.00822039546767385
Angola.to.Uganda.count	Angola	Uganda	0.0163297045101089	0	0	0	0	0.0146634081315263
Angola.to.Zambia.count	Angola	Zambia	0.016885136636303	0	0	0	0	0.0166629637858254
Angola.to.Zimbabwe.count	Angola	Zimbabwe	0.0648744723394801	0	0	0	1	0.0589868918018218
Burkina_Faso.to.Angola.count	Burkina_Faso	Angola	0.0127749389024661	0	0	0	0	0.0126638524772273
Burkina_Faso.to.Central_African_Republic.count	Burkina_Faso	Central_African_Republic	0.0218840257720507	0	0	0	0	0.0197733836925128
Burkina_Faso.to.Egypt.count	Burkina_Faso	Egypt	0.0126638524772273	0	0	0	0	0.0124416796267496
Burkina_Faso.to.Guinea.count	Burkina_Faso	Guinea	0.0112197289491224	0	0	0	0	0.0112197289491224
Burkina_Faso.to.Kenya.count	Burkina_Faso	Kenya	0.0499888913574761	0	0	0	0	0.0442123972450567
Burkina_Faso.to.Madagascar.count	Burkina_Faso	Madagascar	0.0206620750944235	0	0	0	0	0.0195512108420351
Burkina_Faso.to.Mauritania.count	Burkina_Faso	Mauritania	0.0938680293268163	0	0	0	1	0.0923128193734726
Burkina_Faso.to.Mayotte.count	Burkina_Faso	Mayotte	0.00566540768718063	0	0	0	0	0.00555432126194179
Burkina_Faso.to.Namibia.count	Burkina_Faso	Namibia	0.0234392357253944	0	0	0	0	0.0232170628749167
Burkina_Faso.to.Saudi_Arabia.count	Burkina_Faso	Saudi_Arabia	0.00933125972006221	0	0	0	0	0.00910908686958454
Burkina_Faso.to.Senegal.count	Burkina_Faso	Senegal	0.303154854476783	0	0	0	1	0.299489002443901
Burkina_Faso.to.Somalia.count	Burkina_Faso	Somalia	0.00777604976671851	0	0	0	0	0.00755387691624084
Burkina_Faso.to.South_Africa.count	Burkina_Faso	South_Africa	0.0504332370584315	0	0	0	0	0.0432126194179071
Burkina_Faso.to.Sudan.count	Burkina_Faso	Sudan	0.00577649411241946	0	0	0	0	0.00566540768718063
Burkina_Faso.to.Tanzania.count	Burkina_Faso	Tanzania	0.00555432126194179	0	0	0	0	0.00533214841146412
Burkina_Faso.to.Uganda.count	Burkina_Faso	Uganda	0.013552543879138	0	0	0	0	0.0119973339257943
Burkina_Faso.to.Zambia.count	Burkina_Faso	Zambia	0.0136636303043768	0	0	0	0	0.0134414574538991
Burkina_Faso.to.Zimbabwe.count	Burkina_Faso	Zimbabwe	0.0403243723616974	0	0	0	0	0.0371028660297712
Central_African_Republic.to.Angola.count	Central_African_Republic	Angola	0.396800710953122	0	0	0	1	0.35880915352144
Central_African_Republic.to.Burkina_Faso.count	Central_African_Republic	Burkina_Faso	0.0739835592090647	0	0	0	1	0.0680959786714063
Central_African_Republic.to.Egypt.count	Central_African_Republic	Egypt	0.46945123305932	0	0	0	1	0.420128860253277
Central_African_Republic.to.Guinea.count	Central_African_Republic	Guinea	0.961897356143079	1	1	0	2	0.87025105532104
Central_African_Republic.to.Kenya.count	Central_African_Republic	Kenya	1.3681404132415	1	1	0	4	0.748944678960231
Central_African_Republic.to.Madagascar.count	Central_African_Republic	Madagascar	0.419351255276605	0	0	0	2	0.330926460786492
Central_African_Republic.to.Mauritania.count	Central_African_Republic	Mauritania	0.0997556098644746	0	0	0	1	0.0900910908686959
Central_African_Republic.to.Mayotte.count	Central_African_Republic	Mayotte	0.0675405465452122	0	0	0	1	0.0625416574094646
Central_African_Republic.to.Namibia.count	Central_African_Republic	Namibia	0.323261497445012	0	0	0	1	0.292490557653855
Central_African_Republic.to.Saudi_Arabia.count	Central_African_Republic	Saudi_Arabia	0.0673183736947345	0	0	0	1	0.0604310153299267
Central_African_Republic.to.Senegal.count	Central_African_Republic	Senegal	0.0963119306820707	0	0	0	1	0.0865363252610531
Central_African_Republic.to.Somalia.count	Central_African_Republic	Somalia	0.0697622750499889	0	0	0	1	0.0636525216618529
Central_African_Republic.to.South_Africa.count	Central_African_Republic	South_Africa	0.894912241724061	1	0	0	3	0.550655409908909
Central_African_Republic.to.Sudan.count	Central_African_Republic	Sudan	0.0650966451899578	0	0	0	1	0.0597644967784937
Central_African_Republic.to.Tanzania.count	Central_African_Republic	Tanzania	0.0587647189513441	0	0	0	1	0.0537658298155965
Central_African_Republic.to.Uganda.count	Central_African_Republic	Uganda	0.136080870917574	0	0	0	1	0.107531659631193
Central_African_Republic.to.Zambia.count	Central_African_Republic	Zambia	0.827816040879805	1	1	0	2	0.757053988002666
Central_African_Republic.to.Zimbabwe.count	Central_African_Republic	Zimbabwe	1.83459231281937	2	2	0	4	0.922128415907576
Egypt.to.Angola.count	Egypt	Angola	0.0183292601644079	0	0	0	0	0.0177738280382137
Egypt.to.Burkina_Faso.count	Egypt	Burkina_Faso	0.0178849144634526	0	0	0	0	0.0174405687624972
Egypt.to.Central_African_Republic.count	Egypt	Central_African_Republic	0.0434347922683848	0	0	0	0	0.0345478782492779
Egypt.to.Guinea.count	Egypt	Guinea	0.0184403465896467	0	0	0	0	0.0181070873139302
Egypt.to.Kenya.count	Egypt	Kenya	0.0618751388580316	0	0	0	1	0.0546545212175072
Egypt.to.Madagascar.count	Egypt	Madagascar	0.500777604976672	0	0	0	1	0.475783159297934
Egypt.to.Mauritania.count	Egypt	Mauritania	0.0312152854921129	0	0	0	0	0.0299933348144857
Egypt.to.Mayotte.count	Egypt	Mayotte	0.0137747167296156	0	0	0	0	0.0134414574538991
Egypt.to.Namibia.count	Egypt	Namibia	0.153854698955788	0	0	0	1	0.149522328371473
Egypt.to.Saudi_Arabia.count	Egypt	Saudi_Arabia	0.0166629637858254	0	0	0	0	0.0164407909353477
Egypt.to.Senegal.count	Egypt	Senegal	0.0237724950011109	0	0	0	0	0.0226616307487225
Egypt.to.Somalia.count	Egypt	Somalia	0.0129971117529438	0	0	0	0	0.012886025327705
Egypt.to.South_Africa.count	Egypt	South_Africa	0.118862475005554	0	0	0	1	0.103532548322595
Egypt.to.Sudan.count	Egypt	Sudan	0.014219062430571	0	0	0	0	0.0137747167296156
Egypt.to.Tanzania.count	Egypt	Tanzania	0.0108864696734059	0	0	0	0	0.0106642968229282
Egypt.to.Uganda.count	Egypt	Uganda	0.0176627416129749	0	0	0	0	0.0163297045101089
Egypt.to.Zambia.count	Egypt	Zambia	0.0208842479449011	0	0	0	0	0.020328815818707
Egypt.to.Zimbabwe.count	Egypt	Zimbabwe	0.0552099533437014	0	0	0	1	0.0512108420351033
Guinea.to.Angola.count	Guinea	Angola	0.0138858031548545	0	0	0	0	0.0137747167296156
Guinea.to.Burkina_Faso.count	Guinea	Burkina_Faso	0.0113308153743613	0	0	0	0	0.0109975560986447
Guinea.to.Central_African_Republic.count	Guinea	Central_African_Republic	0.0194401244167963	0	0	0	0	0.0177738280382137
Guinea.to.Egypt.count	Guinea	Egypt	0.0127749389024661	0	0	0	0	0.0124416796267496
Guinea.to.Kenya.count	Guinea	Kenya	0.0428793601421906	0	0	0	0	0.0376582981559653
Guinea.to.Madagascar.count	Guinea	Madagascar	0.0215507664963341	0	0	0	0	0.0204399022439458
Guinea.to.Mauritania.count	Guinea	Mauritania	0.021661852921573	0	0	0	0	0.02099533437014
Guinea.to.Mayotte.count	Guinea	Mayotte	0.00633192623861364	0	0	0	0	0.00622083981337481
Guinea.to.Namibia.count	Guinea	Namibia	0.0287713841368585	0	0	0	0	0.0282159520106643
Guinea.to.Saudi_Arabia.count	Guinea	Saudi_Arabia	0.00866474116862919	0	0	0	0	0.00866474116862919
Guinea.to.Senegal.count	Guinea	Senegal	0.0157742723839147	0	0	0	0	0.0152188402577205
Guinea.to.Somalia.count	Guinea	Somalia	0.00622083981337481	0	0	0	0	0.00622083981337481
Guinea.to.South_Africa.count	Guinea	South_Africa	0.0488780271050878	0	0	0	0	0.0443234836702955
Guinea.to.Sudan.count	Guinea	Sudan	0.00622083981337481	0	0	0	0	0.0058875805376583
Guinea.to.Tanzania.count	Guinea	Tanzania	0.00533214841146412	0	0	0	0	0.00533214841146412
Guinea.to.Uganda.count	Guinea	Uganda	0.0118862475005554	0	0	0	0	0.0113308153743613
Guinea.to.Zambia.count	Guinea	Zambia	0.0192179515663186	0	0	0	0	0.0189957787158409
Guinea.to.Zimbabwe.count	Guinea	Zimbabwe	0.0424350144412353	0	0	0	0	0.0383248167073984
Kenya.to.Angola.count	Kenya	Angola	0.437458342590535	0	0	0	1	0.403799155743168
Kenya.to.Burkina_Faso.count	Kenya	Burkina_Faso	0.0930904243501444	0	0	0	1	0.0873139302377249
Kenya.to.Central_African_Republic.count	Kenya	Central_African_Republic	0.631526327482782	0	0	0	3	0.371584092423906
Kenya.to.Egypt.count	Kenya	Egypt	0.106309708953566	0	0	0	1	0.0976449677849367
Kenya.to.Guinea.count	Kenya	Guinea	0.0577649411241946	0	0	0	1	0.0537658298155965
Kenya.to.Madagascar.count	Kenya	Madagascar	1.51955121084204	2	2	0	3	0.832148411464119
Kenya.to.Mauritania.count	Kenya	Mauritania	0.170406576316374	0	0	0	1	0.158520328815819
Kenya.to.Mayotte.count	Kenya	Mayotte	0.68229282381693	1	1	0	1	0.636303043768052
Kenya.to.Namibia.count	Kenya	Namibia	0.112197289491224	0	0	0	1	0.104199066874028
Kenya.to.Saudi_Arabia.count	Kenya	Saudi_Arabia	0.811486336369696	1	1	0	2	0.756054210175517
Kenya.to.Senegal.count	Kenya	Senegal	0.140079982226172	0	0	0	1	0.129526771828483
Kenya.to.Somalia.count	Kenya	Somalia	0.934792268384803	1	1	0	2	0.867473894690069
Kenya.to.South_Africa.count	Kenya	South_Africa	2.63719173516996	2	2	0	6	0.910131081981782
Kenya.to.Sudan.count	Kenya	Sudan	0.952788269273495	1	1	0	2	0.83870251055321
Kenya.to.Tanzania.count	Kenya	Tanzania	0.866585203288158	1	1	0	2	0.803821373028216
Kenya.to.Uganda.count	Kenya	Uganda	0.55632081759609	0	0	0	2	0.320039991113086
Kenya.to.Zambia.count	Kenya	Zambia	0.079871139746723	0	0	0	1	0.0739835592090647
Kenya.to.Zimbabwe.count	Kenya	Zimbabwe	0.590313263719173	0	0	0	2	0.384025772050655
Madagascar.to.Angola.count	Madagascar	Angola	0.0790935347700511	0	0	0	1	0.0765385469895579
Madagascar.to.Burkina_Faso.count	Madagascar	Burkina_Faso	0.027771606309709	0	0	0	0	0.0271050877582759
Madagascar.to.Central_African_Republic.count	Madagascar	Central_African_Republic	0.0619862252832704	0	0	0	1	0.050766496334148
Madagascar.to.Egypt.count	Madagascar	Egypt	0.282048433681404	0	0	0	1	0.271606309708954
Madagascar.to.Guinea.count	Madagascar	Guinea	0.0233281493001555	0	0	0	0	0.0226616307487225
Madagascar.to.Kenya.count	Madagascar	Kenya	0.372694956676294	0	0	0	2	0.231170850922017
Madagascar.to.Mauritania.count	Madagascar	Mauritania	0.0478782492779382	0	0	0	0	0.0463230393245945
Madagascar.to.Mayotte.count	Madagascar	Mayotte	0.210064430126639	0	0	0	1	0.20517662741613
Madagascar.to.Namibia.count	Madagascar	Namibia	0.121417462786048	0	0	0	1	0.117640524327927
Madagascar.to.Saudi_Arabia.count	Madagascar	Saudi_Arabia	0.0787602754943346	0	0	0	1	0.0760942012886025
Madagascar.to.Senegal.count	Madagascar	Senegal	0.0366585203288158	0	0	0	0	0.0355476560764275
Madagascar.to.Somalia.count	Madagascar	Somalia	0.0451010886469673	0	0	0	0	0.0437680515441013
Madagascar.to.South_Africa.count	Madagascar	South_Africa	0.505887580537658	0	0	0	2	0.35880915352144
Madagascar.to.Sudan.count	Madagascar	Sudan	0.0427682737169518	0	0	0	0	0.0414352366140858
Madagascar.to.Tanzania.count	Madagascar	Tanzania	0.022328371473006	0	0	0	0	0.021661852921573
Madagascar.to.Uganda.count	Madagascar	Uganda	0.0298822483892468	0	0	0	0	0.0269940013330371
Madagascar.to.Zambia.count	Madagascar	Zambia	0.0285492112863808	0	0	0	0	0.027771606309709
Madagascar.to.Zimbabwe.count	Madagascar	Zimbabwe	0.0936458564763386	0	0	0	1	0.082537213952455
Mauritania.to.Angola.count	Mauritania	Angola	0.013552543879138	0	0	0	0	0.0129971117529438
Mauritania.to.Burkina_Faso.count	Mauritania	Burkina_Faso	0.0778715840924239	0	0	0	1	0.0774272383914686
Mauritania.to.Central_African_Republic.count	Mauritania	Central_African_Republic	0.0298822483892468	0	0	0	0	0.0263274827816041
Mauritania.to.Egypt.count	Mauritania	Egypt	0.014219062430571	0	0	0	0	0.0138858031548545
Mauritania.to.Guinea.count	Mauritania	Guinea	0.0106642968229282	0	0	0	0	0.0104421239724506
Mauritania.to.Kenya.count	Mauritania	Kenya	0.060208842479449	0	0	0	1	0.050766496334148
Mauritania.to.Madagascar.count	Mauritania	Madagascar	0.0254387913796934	0	0	0	0	0.0246611864030216
Mauritania.to.Mayotte.count	Mauritania	Mayotte	0.00855365474339036	0	0	0	0	0.00844256831815152
Mauritania.to.Namibia.count	Mauritania	Namibia	0.0253277049544546	0	0	0	0	0.0251055321039769
Mauritania.to.Saudi_Arabia.count	Mauritania	Saudi_Arabia	0.0101088646967341	0	0	0	0	0.0101088646967341
Mauritania.to.Senegal.count	Mauritania	Senegal	0.151966229726727	0	0	0	1	0.150077760497667
Mauritania.to.Somalia.count	Mauritania	Somalia	0.00877582759386803	0	0	0	0	0.00866474116862919
Mauritania.to.South_Africa.count	Mauritania	South_Africa	0.0705398800266607	0	0	0	1	0.054099089091313
Mauritania.to.Sudan.count	Mauritania	Sudan	0.00944234614530104	0	0	0	0	0.0089980004443457
Mauritania.to.Tanzania.count	Mauritania	Tanzania	0.00710953121528549	0	0	0	0	0.00699844479004666
Mauritania.to.Uganda.count	Mauritania	Uganda	0.0225505443234837	0	0	0	0	0.0194401244167963
Mauritania.to.Zambia.count	Mauritania	Zambia	0.0166629637858254	0	0	0	0	0.0161075316596312
Mauritania.to.Zimbabwe.count	Mauritania	Zimbabwe	0.0451010886469673	0	0	0	0	0.0411019773383693
Mayotte.to.Angola.count	Mayotte	Angola	0.0129971117529438	0	0	0	0	0.012886025327705
Mayotte.to.Burkina_Faso.count	Mayotte	Burkina_Faso	0.0105532103976894	0	0	0	0	0.0105532103976894
Mayotte.to.Central_African_Republic.count	Mayotte	Central_African_Republic	0.0198844701177516	0	0	0	0	0.0187736058653633
Mayotte.to.Egypt.count	Mayotte	Egypt	0.013552543879138	0	0	0	0	0.0129971117529438
Mayotte.to.Guinea.count	Mayotte	Guinea	0.00877582759386803	0	0	0	0	0.00810930904243501
Mayotte.to.Kenya.count	Mayotte	Kenya	0.0564319040213286	0	0	0	0	0.0488780271050878
Mayotte.to.Madagascar.count	Mayotte	Madagascar	0.140635414352366	0	0	0	1	0.134192401688514
Mayotte.to.Mauritania.count	Mayotte	Mauritania	0.0244390135525439	0	0	0	0	0.0238835814263497
Mayotte.to.Namibia.count	Mayotte	Namibia	0.0221061986225283	0	0	0	0	0.0217729393468118
Mayotte.to.Saudi_Arabia.count	Mayotte	Saudi_Arabia	0.0103310375472117	0	0	0	0	0.0101088646967341
Mayotte.to.Senegal.count	Mayotte	Senegal	0.0164407909353477	0	0	0	0	0.01621861808487
Mayotte.to.Somalia.count	Mayotte	Somalia	0.00633192623861364	0	0	0	0	0.00633192623861364
Mayotte.to.South_Africa.count	Mayotte	South_Africa	0.122639413463675	0	0	0	1	0.109086869584537
Mayotte.to.Sudan.count	Mayotte	Sudan	0.00833148189291269	0	0	0	0	0.00822039546767385
Mayotte.to.Tanzania.count	Mayotte	Tanzania	0.00455454343479227	0	0	0	0	0.00455454343479227
Mayotte.to.Uganda.count	Mayotte	Uganda	0.0131081981781826	0	0	0	0	0.0116640746500778
Mayotte.to.Zambia.count	Mayotte	Zambia	0.0129971117529438	0	0	0	0	0.0125527660519884
Mayotte.to.Zimbabwe.count	Mayotte	Zimbabwe	0.0402132859364586	0	0	0	0	0.0374361253054877
Namibia.to.Angola.count	Namibia	Angola	0.00988669184625639	0	0	0	0	0.00966451899577872
Namibia.to.Burkina_Faso.count	Namibia	Burkina_Faso	0.0125527660519884	0	0	0	0	0.0121084203510331
Namibia.to.Central_African_Republic.count	Namibia	Central_African_Republic	0.0238835814263497	0	0	0	0	0.021661852921573
Namibia.to.Egypt.count	Namibia	Egypt	0.0494334592312819	0	0	0	0	0.0484336814041324
Namibia.to.Guinea.count	Namibia	Guinea	0.0104421239724506	0	0	0	0	0.00988669184625639
Namibia.to.Kenya.count	Namibia	Kenya	0.0405465452121751	0	0	0	0	0.0375472117307265
Namibia.to.Madagascar.count	Namibia	Madagascar	0.0465452121750722	0	0	0	0	0.0434347922683848
Namibia.to.Mauritania.count	Namibia	Mauritania	0.0212175072206176	0	0	0	0	0.0205509886691846
Namibia.to.Mayotte.count	Namibia	Mayotte	0.00655409908909131	0	0	0	0	0.00655409908909131
Namibia.to.Saudi_Arabia.count	Namibia	Saudi_Arabia	0.00777604976671851	0	0	0	0	0.00777604976671851
Namibia.to.Senegal.count	Namibia	Senegal	0.0167740502110642	0	0	0	0	0.0158853588091535
Namibia.to.Somalia.count	Namibia	Somalia	0.00710953121528549	0	0	0	0	0.00710953121528549
Namibia.to.South_Africa.count	Namibia	South_Africa	0.0557653854698956	0	0	0	1	0.0509886691846256
Namibia.to.Sudan.count	Namibia	Sudan	0.00622083981337481	0	0	0	0	0.00610975338813597
Namibia.to.Tanzania.count	Namibia	Tanzania	0.00422128415907576	0	0	0	0	0.00422128415907576
Namibia.to.Uganda.count	Namibia	Uganda	0.0124416796267496	0	0	0	0	0.0116640746500778
Namibia.to.Zambia.count	Namibia	Zambia	0.0156631859586759	0	0	0	0	0.015552099533437
Namibia.to.Zimbabwe.count	Namibia	Zimbabwe	0.0368806931792935	0	0	0	0	0.0348811375249944
Saudi_Arabia.to.Angola.count	Saudi_Arabia	Angola	0.0159964452343924	0	0	0	0	0.0154410131081982
Saudi_Arabia.to.Burkina_Faso.count	Saudi_Arabia	Burkina_Faso	0.0118862475005554	0	0	0	0	0.0118862475005554
Saudi_Arabia.to.Central_African_Republic.count	Saudi_Arabia	Central_African_Republic	0.0225505443234837	0	0	0	0	0.0201066429682293
Saudi_Arabia.to.Egypt.count	Saudi_Arabia	Egypt	0.0106642968229282	0	0	0	0	0.0104421239724506
Saudi_Arabia.to.Guinea.count	Saudi_Arabia	Guinea	0.00710953121528549	0	0	0	0	0.00699844479004666
Saudi_Arabia.to.Kenya.count	Saudi_Arabia	Kenya	0.0732059542323928	0	0	0	1	0.059542323928016
Saudi_Arabia.to.Madagascar.count	Saudi_Arabia	Madagascar	0.0303265940902022	0	0	0	0	0.0285492112863808
Saudi_Arabia.to.Mauritania.count	Saudi_Arabia	Mauritania	0.0231059764496779	0	0	0	0	0.022328371473006
Saudi_Arabia.to.Mayotte.count	Saudi_Arabia	Mayotte	0.00722061764052433	0	0	0	0	0.00677627193956898
Saudi_Arabia.to.Namibia.count	Saudi_Arabia	Namibia	0.0212175072206176	0	0	0	0	0.0206620750944235
Saudi_Arabia.to.Senegal.count	Saudi_Arabia	Senegal	0.0179960008886914	0	0	0	0	0.0175516551877361
Saudi_Arabia.to.Somalia.count	Saudi_Arabia	Somalia	0.0114419017996001	0	0	0	0	0.0114419017996001
Saudi_Arabia.to.South_Africa.count	Saudi_Arabia	South_Africa	0.0549877804932237	0	0	0	0	0.0483225949788936
Saudi_Arabia.to.Sudan.count	Saudi_Arabia	Sudan	0.0268829149077983	0	0	0	0	0.0265496556320818
Saudi_Arabia.to.Tanzania.count	Saudi_Arabia	Tanzania	0.0116640746500778	0	0	0	0	0.0113308153743613
Saudi_Arabia.to.Uganda.count	Saudi_Arabia	Uganda	0.0151077538324817	0	0	0	0	0.014219062430571
Saudi_Arabia.to.Zambia.count	Saudi_Arabia	Zambia	0.0145523217062875	0	0	0	0	0.0141079760053321
Saudi_Arabia.to.Zimbabwe.count	Saudi_Arabia	Zimbabwe	0.038546989557876	0	0	0	0	0.0364363474783381
Senegal.to.Angola.count	Senegal	Angola	0.0133303710286603	0	0	0	0	0.0131081981781826
Senegal.to.Burkina_Faso.count	Senegal	Burkina_Faso	0.640746500777605	1	1	0	1	0.632081759608976
Senegal.to.Central_African_Republic.count	Senegal	Central_African_Republic	0.0266607420573206	0	0	0	0	0.0248833592534992
Senegal.to.Egypt.count	Senegal	Egypt	0.014885580982004	0	0	0	0	0.0147744945567652
Senegal.to.Guinea.count	Senegal	Guinea	0.0123305932015108	0	0	0	0	0.0119973339257943
Senegal.to.Kenya.count	Senegal	Kenya	0.0616529660075539	0	0	0	1	0.0529882248389247
Senegal.to.Madagascar.count	Senegal	Madagascar	0.0247722728282604	0	0	0	0	0.0234392357253944
Senegal.to.Mauritania.count	Senegal	Mauritania	0.185625416574095	0	0	0	1	0.183403688069318
Senegal.to.Mayotte.count	Senegal	Mayotte	0.00866474116862919	0	0	0	0	0.00866474116862919
Senegal.to.Namibia.count	Senegal	Namibia	0.0262163963563653	0	0	0	0	0.0254387913796934
Senegal.to.Saudi_Arabia.count	Senegal	Saudi_Arabia	0.0122195067762719	0	0	0	0	0.0119973339257943
Senegal.to.Somalia.count	Senegal	Somalia	0.0089980004443457	0	0	0	0	0.0089980004443457
Senegal.to.South_Africa.count	Senegal	South_Africa	0.0698733614752277	0	0	0	1	0.0556542990446567
Senegal.to.Sudan.count	Senegal	Sudan	0.00955343257053988	0	0	0	0	0.00888691401910686
Senegal.to.Tanzania.count	Senegal	Tanzania	0.00833148189291269	0	0	0	0	0.00822039546767385
Senegal.to.Uganda.count	Senegal	Uganda	0.0205509886691846	0	0	0	0	0.0186625194401244
Senegal.to.Zambia.count	Senegal	Zambia	0.0165518773605865	0	0	0	0	0.0165518773605865
Senegal.to.Zimbabwe.count	Senegal	Zimbabwe	0.0484336814041324	0	0	0	0	0.0442123972450567
Somalia.to.Angola.count	Somalia	Angola	0.0116640746500778	0	0	0	0	0.0116640746500778
Somalia.to.Burkina_Faso.count	Somalia	Burkina_Faso	0.0126638524772273	0	0	0	0	0.0121084203510331
Somalia.to.Central_African_Republic.count	Somalia	Central_African_Republic	0.0182181737391691	0	0	0	0	0.0172183959120196
Somalia.to.Egypt.count	Somalia	Egypt	0.0114419017996001	0	0	0	0	0.0113308153743613
Somalia.to.Guinea.count	Somalia	Guinea	0.00610975338813597	0	0	0	0	0.00610975338813597
Somalia.to.Kenya.count	Somalia	Kenya	0.0662075094423461	0	0	0	1	0.050766496334148
Somalia.to.Madagascar.count	Somalia	Madagascar	0.0266607420573206	0	0	0	0	0.0248833592534992
Somalia.to.Mauritania.count	Somalia	Mauritania	0.0234392357253944	0	0	0	0	0.0228838035992002
Somalia.to.Mayotte.count	Somalia	Mayotte	0.00577649411241946	0	0	0	0	0.00577649411241946
Somalia.to.Namibia.count	Somalia	Namibia	0.022994890024439	0	0	0	0	0.0224394578982448
Somalia.to.Saudi_Arabia.count	Somalia	Saudi_Arabia	0.0177738280382137	0	0	0	0	0.0174405687624972
Somalia.to.Senegal.count	Somalia	Senegal	0.01621861808487	0	0	0	0	0.0161075316596312
Somalia.to.South_Africa.count	Somalia	South_Africa	0.057542768273717	0	0	0	1	0.0503221506331926
Somalia.to.Sudan.count	Somalia	Sudan	0.00999777827149522	0	0	0	0	0.00977560542101755
Somalia.to.Tanzania.count	Somalia	Tanzania	0.00633192623861364	0	0	0	0	0.00633192623861364
Somalia.to.Uganda.count	Somalia	Uganda	0.0144412352810487	0	0	0	0	0.0132192846034215
Somalia.to.Zambia.count	Somalia	Zambia	0.0132192846034215	0	0	0	0	0.0129971117529438
Somalia.to.Zimbabwe.count	Somalia	Zimbabwe	0.0404354587869362	0	0	0	0	0.0386580759831149
South_Africa.to.Angola.count	South_Africa	Angola	0.0839813374805599	0	0	0	1	0.0772050655409909
South_Africa.to.Burkina_Faso.count	South_Africa	Burkina_Faso	0.0988669184625639	0	0	0	1	0.0940902021772939
South_Africa.to.Central_African_Republic.count	South_Africa	Central_African_Republic	0.541768495889802	0	0	0	2	0.414685625416574
South_Africa.to.Egypt.count	South_Africa	Egypt	0.127749389024661	0	0	0	1	0.118529215729838
South_Africa.to.Guinea.count	South_Africa	Guinea	0.0485447678293712	0	0	0	0	0.0465452121750722
South_Africa.to.Kenya.count	South_Africa	Kenya	0.696178626971784	0	0	0	3	0.421017551655188
South_Africa.to.Madagascar.count	South_Africa	Madagascar	0.392357253943568	0	0	0	2	0.308375916463008
South_Africa.to.Mauritania.count	South_Africa	Mauritania	0.195289935569873	0	0	0	1	0.181848478115974
South_Africa.to.Mayotte.count	South_Africa	Mayotte	0.16696289713397	0	0	0	1	0.157742723839147
South_Africa.to.Namibia.count	South_Africa	Namibia	0.141968451455232	0	0	0	1	0.133081537436125
South_Africa.to.Saudi_Arabia.count	South_Africa	Saudi_Arabia	0.081870695401022	0	0	0	1	0.076427460564319
South_Africa.to.Senegal.count	South_Africa	Senegal	0.161852921572984	0	0	0	1	0.151632970451011
South_Africa.to.Somalia.count	South_Africa	Somalia	0.0598755832037325	0	0	0	1	0.0562097311708509
South_Africa.to.Sudan.count	South_Africa	Sudan	0.0590979782270607	0	0	0	1	0.0557653854698956
South_Africa.to.Tanzania.count	South_Africa	Tanzania	0.0465452121750722	0	0	0	0	0.0432126194179071
South_Africa.to.Uganda.count	South_Africa	Uganda	0.172628304821151	0	0	0	1	0.142634970006665
South_Africa.to.Zambia.count	South_Africa	Zambia	0.0619862252832704	0	0	0	1	0.0583203732503888
South_Africa.to.Zimbabwe.count	South_Africa	Zimbabwe	1.34758942457232	1	1	0	3	0.804932237280604
Sudan.to.Angola.count	Sudan	Angola	0.0136636303043768	0	0	0	0	0.0133303710286603
Sudan.to.Burkina_Faso.count	Sudan	Burkina_Faso	0.0138858031548545	0	0	0	0	0.013552543879138
Sudan.to.Central_African_Republic.count	Sudan	Central_African_Republic	0.0212175072206176	0	0	0	0	0.0197733836925128
Sudan.to.Egypt.count	Sudan	Egypt	0.0121084203510331	0	0	0	0	0.0116640746500778
Sudan.to.Guinea.count	Sudan	Guinea	0.007442790491002	0	0	0	0	0.00733170406576316
Sudan.to.Kenya.count	Sudan	Kenya	0.219173516996223	0	0	0	1	0.191512997111753
Sudan.to.Madagascar.count	Sudan	Madagascar	0.0275494334592313	0	0	0	0	0.0264385692068429
Sudan.to.Mauritania.count	Sudan	Mauritania	0.0286602977116196	0	0	0	0	0.0278826927349478
Sudan.to.Mayotte.count	Sudan	Mayotte	0.00910908686958454	0	0	0	0	0.00866474116862919
Sudan.to.Namibia.count	Sudan	Namibia	0.0231059764496779	0	0	0	0	0.0227727171739613
Sudan.to.Saudi_Arabia.count	Sudan	Saudi_Arabia	0.0268829149077983	0	0	0	0	0.0265496556320818
Sudan.to.Senegal.count	Sudan	Senegal	0.0186625194401244	0	0	0	0	0.0175516551877361
Sudan.to.Somalia.count	Sudan	Somalia	0.00933125972006221	0	0	0	0	0.00922017329482337
Sudan.to.South_Africa.count	Sudan	South_Africa	0.0544323483670296	0	0	0	0	0.0474339035769829
Sudan.to.Tanzania.count	Sudan	Tanzania	0.15263274827816	0	0	0	1	0.151299711175294
Sudan.to.Uganda.count	Sudan	Uganda	0.0144412352810487	0	0	0	0	0.0134414574538991
Sudan.to.Zambia.count	Sudan	Zambia	0.0116640746500778	0	0	0	0	0.0115529882248389
Sudan.to.Zimbabwe.count	Sudan	Zimbabwe	0.0406576316374139	0	0	0	0	0.0384359031326372
Tanzania.to.Angola.count	Tanzania	Angola	0.0113308153743613	0	0	0	0	0.0112197289491224
Tanzania.to.Burkina_Faso.count	Tanzania	Burkina_Faso	0.0127749389024661	0	0	0	0	0.0125527660519884
Tanzania.to.Central_African_Republic.count	Tanzania	Central_African_Republic	0.0207731615196623	0	0	0	0	0.0193290379915574
Tanzania.to.Egypt.count	Tanzania	Egypt	0.0109975560986447	0	0	0	0	0.0105532103976894
Tanzania.to.Guinea.count	Tanzania	Guinea	0.00799822261719618	0	0	0	0	0.00788713619195734
Tanzania.to.Kenya.count	Tanzania	Kenya	0.167740502110642	0	0	0	1	0.151410797600533
Tanzania.to.Madagascar.count	Tanzania	Madagascar	0.0217729393468118	0	0	0	0	0.0205509886691846
Tanzania.to.Mauritania.count	Tanzania	Mauritania	0.0242168407020662	0	0	0	0	0.0239946678515885
Tanzania.to.Mayotte.count	Tanzania	Mayotte	0.00655409908909131	0	0	0	0	0.00655409908909131
Tanzania.to.Namibia.count	Tanzania	Namibia	0.0218840257720507	0	0	0	0	0.0215507664963341
Tanzania.to.Saudi_Arabia.count	Tanzania	Saudi_Arabia	0.0137747167296156	0	0	0	0	0.013552543879138
Tanzania.to.Senegal.count	Tanzania	Senegal	0.0174405687624972	0	0	0	0	0.0169962230615419
Tanzania.to.Somalia.count	Tanzania	Somalia	0.00788713619195734	0	0	0	0	0.00788713619195734
Tanzania.to.South_Africa.count	Tanzania	South_Africa	0.0483225949788936	0	0	0	0	0.0425461008664741
Tanzania.to.Sudan.count	Tanzania	Sudan	0.0447678293712508	0	0	0	0	0.0421017551655188
Tanzania.to.Uganda.count	Tanzania	Uganda	0.0133303710286603	0	0	0	0	0.0121084203510331
Tanzania.to.Zambia.count	Tanzania	Zambia	0.0111086425238836	0	0	0	0	0.0111086425238836
Tanzania.to.Zimbabwe.count	Tanzania	Zimbabwe	0.0367696067540547	0	0	0	0	0.0341035325483226
Uganda.to.Angola.count	Uganda	Angola	0.0351033103754721	0	0	0	0	0.0325483225949789
Uganda.to.Burkina_Faso.count	Uganda	Burkina_Faso	0.0619862252832704	0	0	0	1	0.0578760275494335
Uganda.to.Central_African_Republic.count	Uganda	Central_African_Republic	0.227616085314375	0	0	0	1	0.193068207065097
Uganda.to.Egypt.count	Uganda	Egypt	0.0367696067540547	0	0	0	0	0.0347700510997556
Uganda.to.Guinea.count	Uganda	Guinea	0.030437680515441	0	0	0	0	0.0283270384359031
Uganda.to.Kenya.count	Uganda	Kenya	1.50211064207954	2	0	0	4	0.665407687180626
Uganda.to.Madagascar.count	Uganda	Madagascar	0.0700955343257054	0	0	0	1	0.0610975338813597
Uganda.to.Mauritania.count	Uganda	Mauritania	0.120417684958898	0	0	0	1	0.110197733836925
Uganda.to.Mayotte.count	Uganda	Mayotte	0.0318818040435459	0	0	0	0	0.0302155076649633
Uganda.to.Namibia.count	Uganda	Namibia	0.0455454343479227	0	0	0	0	0.0434347922683848
Uganda.to.Saudi_Arabia.count	Uganda	Saudi_Arabia	0.0376582981559653	0	0	0	0	0.0354365696511886
Uganda.to.Senegal.count	Uganda	Senegal	0.1049766718507	0	0	0	1	0.096756276383026
Uganda.to.Somalia.count	Uganda	Somalia	0.0293268162630527	0	0	0	0	0.0273272606087536
Uganda.to.South_Africa.count	Uganda	South_Africa	0.658631415241058	0	0	0	3	0.411908464785603
Uganda.to.Sudan.count	Uganda	Sudan	0.0398800266607421	0	0	0	0	0.03721395245501
Uganda.to.Tanzania.count	Uganda	Tanzania	0.0307709397911575	0	0	0	0	0.0288824705620973
Uganda.to.Zambia.count	Uganda	Zambia	0.0375472117307265	0	0	0	0	0.0355476560764275
Uganda.to.Zimbabwe.count	Uganda	Zimbabwe	0.18984670073317	0	0	0	1	0.153299266829593
Zambia.to.Angola.count	Zambia	Angola	0.0132192846034215	0	0	0	0	0.012886025327705
Zambia.to.Burkina_Faso.count	Zambia	Burkina_Faso	0.0107753832481671	0	0	0	0	0.0106642968229282
Zambia.to.Central_African_Republic.count	Zambia	Central_African_Republic	0.0324372361697401	0	0	0	0	0.0281048655854255
Zambia.to.Egypt.count	Zambia	Egypt	0.015552099533437	0	0	0	0	0.0149966674072428
Zambia.to.Guinea.count	Zambia	Guinea	0.00988669184625639	0	0	0	0	0.00977560542101755
Zambia.to.Kenya.count	Zambia	Kenya	0.0396578538102644	0	0	0	0	0.0354365696511886
Zambia.to.Madagascar.count	Zambia	Madagascar	0.0212175072206176	0	0	0	0	0.0199955565429904
Zambia.to.Mauritania.count	Zambia	Mauritania	0.022328371473006	0	0	0	0	0.0222172850477672
Zambia.to.Mayotte.count	Zambia	Mayotte	0.00555432126194179	0	0	0	0	0.00522106198622528
Zambia.to.Namibia.count	Zambia	Namibia	0.0259942235058876	0	0	0	0	0.0257720506554099
Zambia.to.Saudi_Arabia.count	Zambia	Saudi_Arabia	0.00755387691624084	0	0	0	0	0.00755387691624084
Zambia.to.Senegal.count	Zambia	Senegal	0.0184403465896467	0	0	0	0	0.0181070873139302
Zambia.to.Somalia.count	Zambia	Somalia	0.00677627193956898	0	0	0	0	0.00666518551433015
Zambia.to.South_Africa.count	Zambia	South_Africa	0.0513219284603421	0	0	0	0	0.0444345700955343
Zambia.to.Sudan.count	Zambia	Sudan	0.00510997556098645	0	0	0	0	0.00499888913574761
Zambia.to.Tanzania.count	Zambia	Tanzania	0.00633192623861364	0	0	0	0	0.00633192623861364
Zambia.to.Uganda.count	Zambia	Uganda	0.00966451899577872	0	0	0	0	0.00910908686958454
Zambia.to.Zimbabwe.count	Zambia	Zimbabwe	0.0397689402355032	0	0	0	0	0.0373250388802488
Zimbabwe.to.Angola.count	Zimbabwe	Angola	0.0688735836480782	0	0	0	1	0.0666518551433015
Zimbabwe.to.Burkina_Faso.count	Zimbabwe	Burkina_Faso	0.0338813596978449	0	0	0	0	0.0333259275716507
Zimbabwe.to.Central_African_Republic.count	Zimbabwe	Central_African_Republic	0.149189069095756	0	0	0	1	0.10397689402355
Zimbabwe.to.Egypt.count	Zimbabwe	Egypt	0.0428793601421906	0	0	0	0	0.0404354587869362
Zimbabwe.to.Guinea.count	Zimbabwe	Guinea	0.0346589646745168	0	0	0	0	0.0336591868473673
Zimbabwe.to.Kenya.count	Zimbabwe	Kenya	0.23094867807154	0	0	0	1	0.169406798489225
Zimbabwe.to.Madagascar.count	Zimbabwe	Madagascar	0.0710953121528549	0	0	0	1	0.0650966451899578
Zimbabwe.to.Mauritania.count	Zimbabwe	Mauritania	0.0747611641857365	0	0	0	1	0.0719840035547656
Zimbabwe.to.Mayotte.count	Zimbabwe	Mayotte	0.0174405687624972	0	0	0	0	0.0167740502110642
Zimbabwe.to.Namibia.count	Zimbabwe	Namibia	0.0724283492557209	0	0	0	1	0.0700955343257054
Zimbabwe.to.Saudi_Arabia.count	Zimbabwe	Saudi_Arabia	0.0237724950011109	0	0	0	0	0.0227727171739613
Zimbabwe.to.Senegal.count	Zimbabwe	Senegal	0.0544323483670296	0	0	0	1	0.0528771384136858
Zimbabwe.to.Somalia.count	Zimbabwe	Somalia	0.0176627416129749	0	0	0	0	0.0171073094867807
Zimbabwe.to.South_Africa.count	Zimbabwe	South_Africa	0.34159075760942	0	0	0	2	0.233836925127749
Zimbabwe.to.Sudan.count	Zimbabwe	Sudan	0.0169962230615419	0	0	0	0	0.0163297045101089
Zimbabwe.to.Tanzania.count	Zimbabwe	Tanzania	0.0138858031548545	0	0	0	0	0.0134414574538991
Zimbabwe.to.Uganda.count	Zimbabwe	Uganda	0.0423239280159964	0	0	0	0	0.035880915352144
Zimbabwe.to.Zambia.count	Zimbabwe	Zambia	0.0475449900022217	0	0	0	0	0.045989780048878
