# Supplementary material for: Phylogeography of Rift Valley Fever Virus in Africa and the Arabian Peninsula
Source: PLoS Negl Trop Dis. 2017 Jan 9;11(1):e0005226. doi: 10.1371/journal.pntd.0005226 (PMC5221768; doi:10.1371/journal.pntd.0005226)
Supplement: S15 File — (CSV) [file pntd.0005226.s015.csv]

			Breakpoint Positions
		In Alignment		In Recombinant Sequence		Relative to 200803162							Detection Methods
Recombination Event Number	Number In .RDP File	Begin	End	Begin	End	Begin	End	Recombinant Sequence(s)	Minor Parental Sequence(s)	Major Parental Sequence(s)	RDP	GENECONV	Bootscan	Maxchi	Chimaera	SiSscan	PhylPro	LARD	3Seq
1	1	1716	6048	1581	5565	1581	5565	2007000608	2007001811	2007000234	3.82457579486219E-19	2.09088853802772E-14	.00999121225738024	1.42207519698486E-13	1.33897319945982E-13	1.60716686947819E-13	NS	NS	7.29641345973304E-31
1									2007000094	200803162
1									2007001564	200803163
1									2007004194	200803164
1									Sudan_28-2010	200803165
1										200803168
1										200803169
1										200803170
1										2007000080
1										2007000222
1										2007000223
1										2007000224
1										2007000225
1										2007000253
1										2007000260
1										2007000324
1										2007000473
1										2007001443
1										2007001602
1										2007001809
1										2007002060
1										2007002444
1										2007002445
1										2007002476
1										2007002482
1										2007002820
1										2007003081
1										2007003644
1										2007004193
1										2008/00099
1										2008/00101
1										KEN/Bar-032/07
1										KEN/Bar-035/07
1										KEN/Gar-004/06
1										KEN/Gar-008/06
1										KEN/Kil-006/07
1										KEN/Mal-032/07
1										TAN/Dod-002/07
2	2	2082	5914	1919	5441	1919	5441	TAN/Tan-001/07	TAN/Dod-002/07	2007001564	2.65530704797418E-18	5.22312093640023E-15	1.96546608510453E-05	2.05269424079913E-14	6.35235219657048E-15	2.14222788877311E-14	NS	NS	3.1188926607102E-31
2									200803162	2007000094
2									200803163	2007001811
2									200803164	2007004194
2									200803165	Sudan_28-2010
2									200803168
2									200803169
2									200803170
2									2007000080
2									2007000222
2									2007000223
2									2007000224
2									2007000225
2									2007000234
2									2007000253
2									2007000260
2									2007000323
2									2007000324
2									2007000473
2									2007000611
2									2007000618
2									2007001107
2									2007001292
2									2007001443
2									2007001602
2									2007001809
2									2007002060
2									2007002444
2									2007002445
2									2007002476
2									2007002482
2									2007002820
2									2007003081
2									2007003644
2									2007004193
2									2008/00099
2									2008/00101
2									KEN/Bar-032/07
2									KEN/Bar-035/07
2									KEN/Gar-004/06
2									KEN/Gar-008/06
2									KEN/Kil-006/07
2									KEN/Mal-032/07
3	3	12948	12997	11934	11979	11934	11979	KEN/Gar-004/06	ANK-6087	2008/00099	2.62119936666772E-06	5.66267207836499E-06	3.54995878618025E-05	NS	NS	NS	NS	NS	NS
3								200803162	ANK-3837
3								200803163	Zinga
3								200803164
3								200803165
3								200803168
3								200803169
3								200803170
3								2007000080
3								2007000222
3								2007000223
3								2007000224
3								2007000225
3								2007000234
3								2007000253
3								2007000260
3								2007000323
3								2007000324
3								2007000473
3								2007000608
3								2007000611
3								2007000618
3								2007001107
3								2007001292
3								2007001443
3								2007001602
3								2007001809
3								2007002060
3								2007002444
3								2007002445
3								2007002476
3								2007002482
3								2007002820
3								2007003081
3								2007003644
3								2007004193
3								KEN/Bar-032/07
3								KEN/Gar-008/06
3								TAN/Dod-002/07
4	4	3700	3770	3412	3477	3412	3477	TAN/Dod-002/07	Unknown (SA-75)	2007000608	1.45555926382441E-05	.000141056644879597	NS	NS	NS	NS	NS	NS	.0427769696820518
4								TAN/Tan-001/07	Unknown(35/74)	200803166
4									Unknown(763/70)	200803167
4									Unknown(Kenya_56_(IB8))	2007000094
4										2007001564
4										2007001811
4										2007004194
4										Sudan_28-2010
4										Sudan_2V-2007
4										Sudan_86-2010
5	5	12818	12996	11814	11978	11814	11978	2008/00099	Unknown (35/74)	2007001564	.000390719849272473	.0207313633474352	NS	NS	NS	NS	NS	NS	NS
5								200803162[T]	Unknown(2373/74)	2007000094
5								200803163[T]	Unknown(763/70)	2007004194
5								200803164[T]	Unknown(SA-75)	Saudi_2000-10911
5								200803165[T]		Sudan_28-2010
5								200803168[T]		Sudan_85-2010
5								200803169[T]		TAN/Tan-001/07
5								200803170[T]
5								2007000080[T]
5								2007000222[T]
5								2007000223[T]
5								2007000224[T]
5								2007000225[T]
5								2007000234[T]
5								2007000253[T]
5								2007000260[T]
5								2007000323[T]
5								2007000324[T]
5								2007000473[T]
5								2007000608[T]
5								2007000611[T]
5								2007000618[T]
5								2007001107[T]
5								2007001292[T]
5								2007001443[T]
5								2007001602[T]
5								2007001809[T]
5								2007002060[T]
5								2007002444[T]
5								2007002445[T]
5								2007002476[T]
5								2007002482[T]
5								2007002820[T]
5								2007003081[T]
5								2007003644[T]
5								2007004193[T]
5								2008/00101
5								KEN/Bar-032/07[T]
5								KEN/Bar-035/07[T]
5								KEN/Gar-004/06[T]
5								KEN/Gar-008/06[T]
5								KEN/Kil-006/07[T]
5								KEN/Mal-032/07[T]
5								TAN/Dod-002/07[T]
6	6	10636	10852	9800	9999	9800	9999	KEN/Gar-008/06	Unknown (200803166)	KEN/Gar-004/06	.0111824658162678	NS	NS	NS	NS	NS	NS	NS	NS
6									Unknown(2007000094)
6									Unknown(2007001564)
6									Unknown(2007001811)
6									Unknown(2007004194)
6									Unknown(TAN/Tan-001/07)
7	7	2413	2962	2225	2731	2225	2731	KEN/Bar-032/07	Unknown (Sudan_7-2010)	KEN/Gar-004/06	.0390950650657457	NS	NS	NS	NS	NS	NS	NS	NS
7								KEN/Bar-035/07[T]	Unknown(200803167)
7									Unknown(Sudan_85-2010)
* = The actual breakpoint position is undetermined (it was most likely overprinted by a subsequent
recombination event).
Minor Parent = Parent contributing the smaller fraction of sequence.
Major Parent = Parent contributing the larger fraction of sequence.
Unknown = Only one parent and a recombinant need be in the alignment for a recombination event to be detectable.
The sequence listed as unknown was used to infer the existance of a missing parental sequence.
NS = No significant P-value was recorded for this recombination event using this method.
